# Supplementary material for: Controlled fabrication of flower-like α-zirconium phosphate for the efficient removal of radioactive strontium from acidic nuclear wastewater
Source: Royal Society of Chemistry journal article supplement (doi:10.1039/c7ta07803j), 2017-01-01
Supplement: c7ta07803j1.pdf [file c7ta07803j1.pdf]

## Supporting information

### **Controlled fabrication of the flower-like $\alpha$ -zirconium phosphate for efficient removal of radioactive strontium from acidic nuclear wastewater**

Wanjun Mu, Qianghong Yu, Rui, Zhang, Xingliang Li, Rui Hu, Yao He, Hongyuan Wei, Yuan Jian\*, Yuchuan Yang

*Institute of Nuclear Physics and Chemistry, China Academy of Engineering Physics,*

*64# Mianshan Road, Mianyang, 621900, Sichuan Province, P. R. China*

Corresponding author: Yuan Jian and Yuchuan Yang

Fax: 86+08162484278

Tel: 86+08162494854

Email address: muwj1012@163.com, muwj2014@163.com

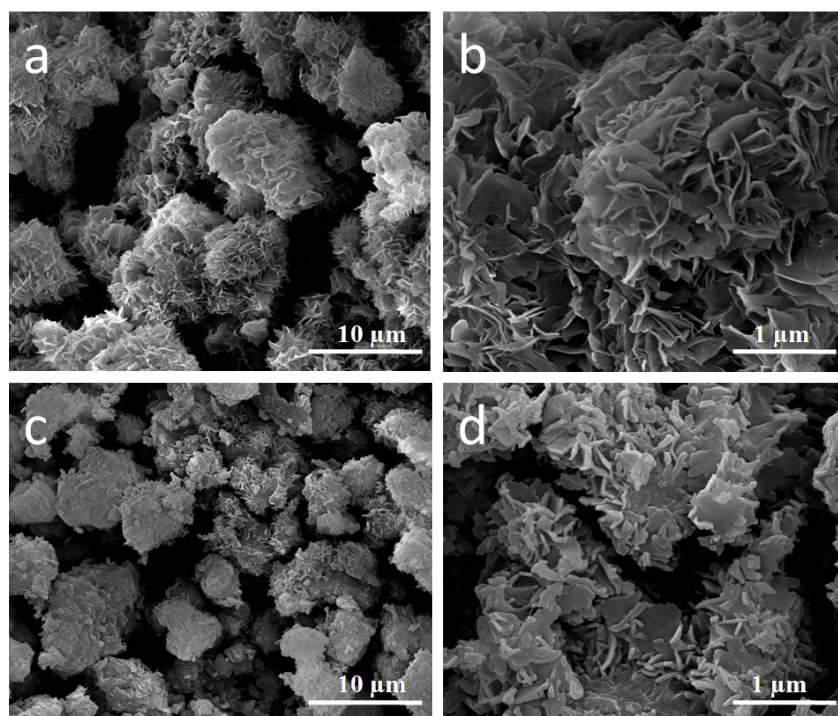

**Fig.1** SEM images of as-prepared samples with different time, (a) and (b) 84h, (c) and (d) 100 h

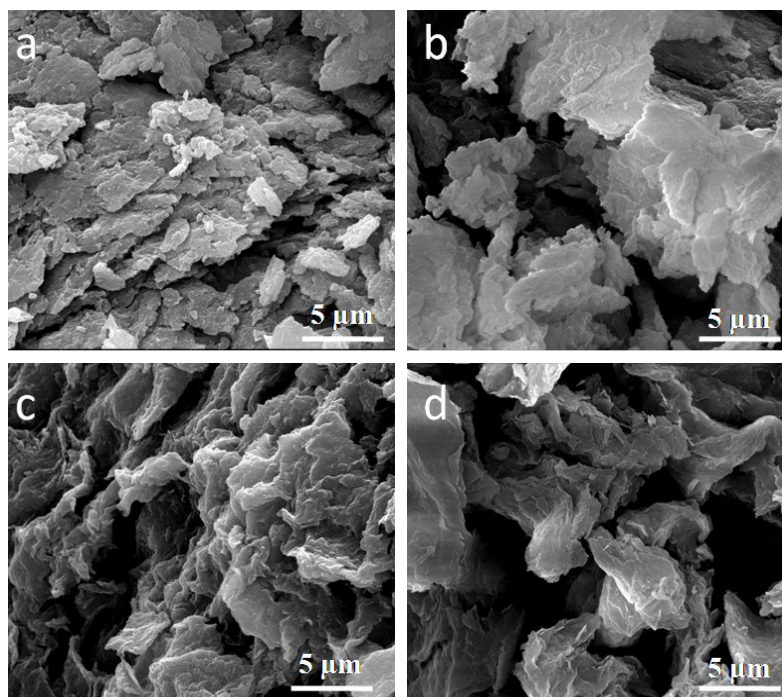

**Fig.2** SEM images of as-prepared samples with different temperature, (a) 60 °C , (b) 70 °C, (c) 90 °C ,(d) 100 °C

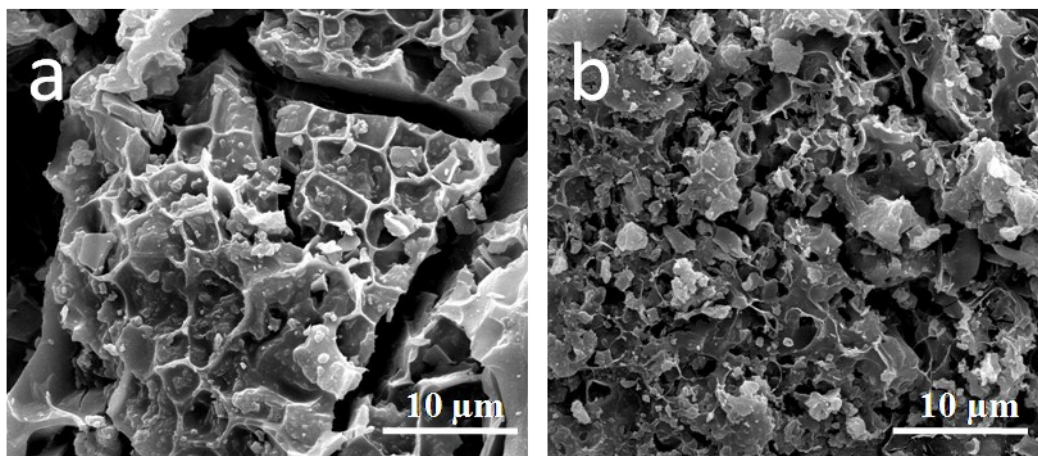

**Fig.3** SEM images of as-prepared samples using  $(\text{NH}_4)_3\text{PO}_4$  as P source

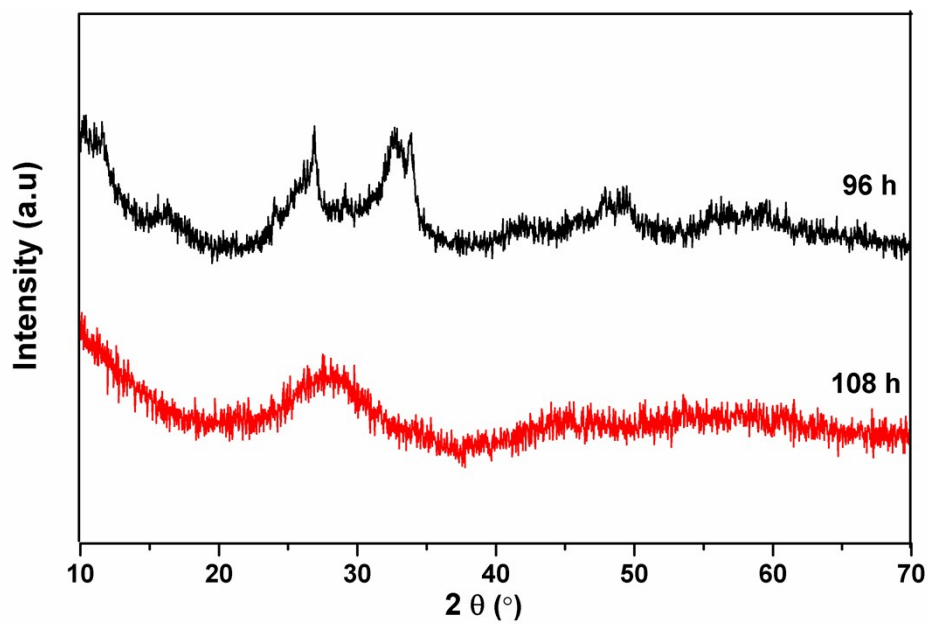

**Fig.4** XRD patterns of as-prepared samples using  $(\text{NH}_4)_3\text{PO}_4$  as P source

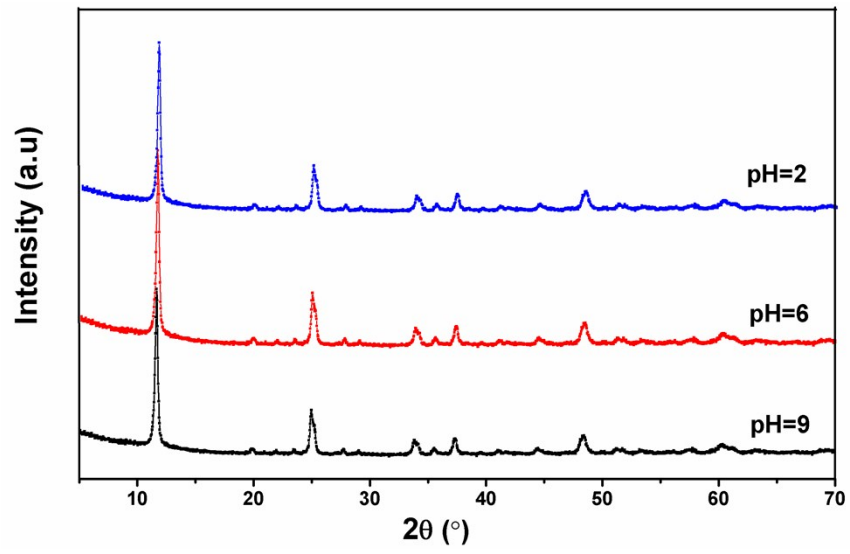

**Fig.5** XRD pattern of as prepared  $\alpha$ -ZrP immersing in aqueous solution with different pH

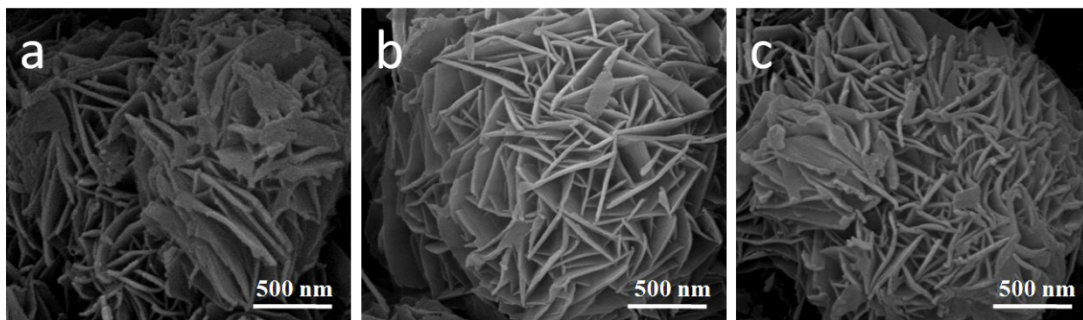

**Fig.6** SEM images of the flower-like  $\alpha$ -ZrP immersing in aqueous solution with different pH, (a) pH=2, (b) pH=6, (c) pH=9.

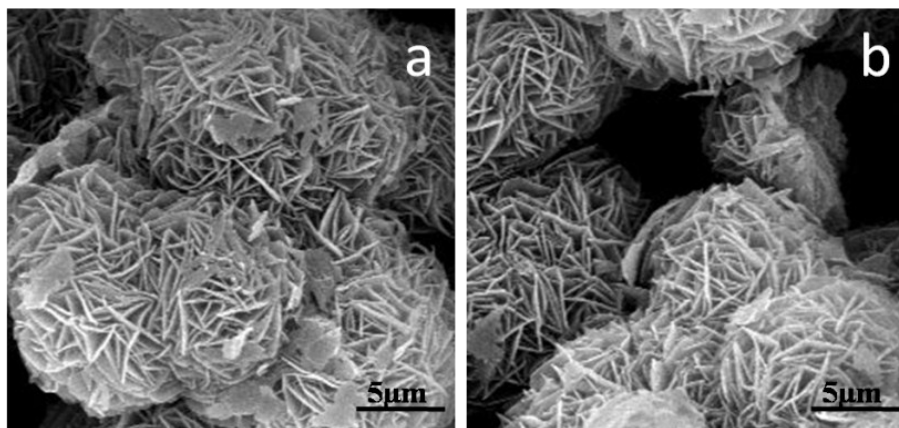

**Fig.7** SEM images of the flower-like  $\alpha$ -ZrP before (a) and after (b) radiation



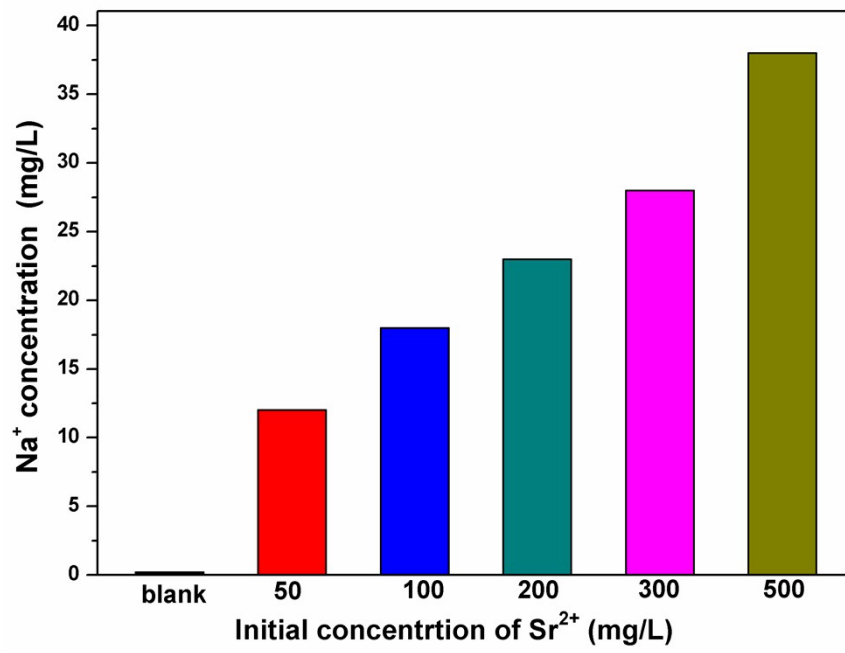

**Fig.8** Concentration of Na<sup>+</sup> in aqueous solution after Sr<sup>2+</sup> adsorption

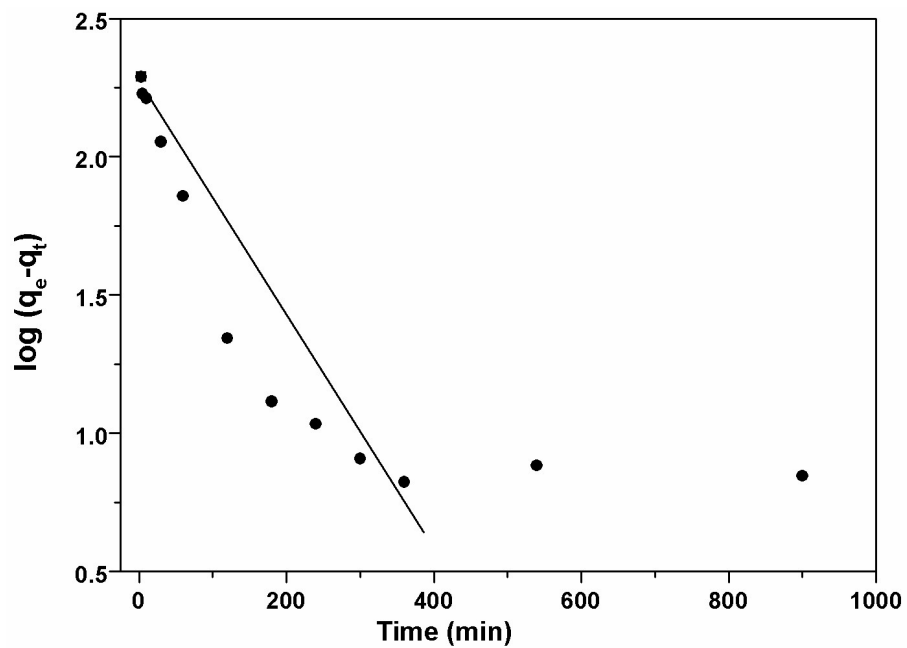

**Fig. 9** Adsorption kinetics for  $\text{Sr}^{2+}$  adsorption on the flower-like  $\alpha$ -ZrP fitted with a pseudo-first-order model



## Table Caption

**Table 1** Equilibrium isotherm model parameters for Sr<sup>2+</sup>adsorption on the flower-like  $\alpha$ -ZrP (T=293 K)

| Temperatur | Langmuir isotherm |                                      |                         |                | Freundlich isotherm |                                                            |                |
|------------|-------------------|--------------------------------------|-------------------------|----------------|---------------------|------------------------------------------------------------|----------------|
|            | e                 | q <sub>m</sub> (mg g <sup>-1</sup> ) | b (L mg <sup>-1</sup> ) | R <sup>2</sup> | n                   | k <sub>f</sub> [mg g <sup>-1</sup> (L/ g) <sup>1/n</sup> ] | R <sup>2</sup> |
| 293K       |                   | 293.43                               | 0.34                    | 0.9985         | 1.231               | 1.071                                                      | 0.9654         |
| 298K       |                   | 247.9                                | 0.25                    | 0.9979         | 2.56                | 16.59                                                      | 0.9543         |
| 303K       |                   | 230.7                                | 0.45                    | 0.9984         | 3.03                | 21.82                                                      | 0.9217         |

**Table 2** kinetic parameters for Sr<sup>2+</sup> sorption onto the flower like  $\alpha$ -ZrP (T=293

K)

| Model                             | Parameters                                    | Sr <sup>2+</sup> |
|-----------------------------------|-----------------------------------------------|------------------|
| Experiment                        | $q_e$ (mg g <sup>-1</sup> )                   | 293.43           |
| Pseudo first-order kinetic model  | $k_1$ (min <sup>-1</sup> )                    | 0.0242           |
|                                   | $q_e^{cal}$ (mg g <sup>-1</sup> )             | 312.45           |
|                                   | R <sup>2</sup>                                | 0.9643           |
| Pseudo second-order kinetic model | $k_2$ (g mg <sup>-1</sup> min <sup>-1</sup> ) | 0.3015           |
|                                   | $q_e^{cal}$ (mg g <sup>-1</sup> )             | 412.57           |
|                                   | R <sup>2</sup>                                | 0.9998           |
